# Supplementary material for: MWCNT-coated textiles for heating and temperature sensing under varying environmental conditions
Source: Royal Society of Chemistry journal article supplement (doi:10.1039/d5ra07103h), 2025-01-01
Supplement: d5ra07103h1.pdf [file d5ra07103h1.pdf]

*Supporting Information for*  
**MWCNT-Coated Textiles for Heating and Temperature Sensing**  
**under Varying Environmental Conditions**

Babak Abdi, Esubalew Kasaw Gebeyehu, Ali R. Tehrani-Bagha\*  
School of Chemical Engineering, Aalto University, Espoo 02150, Finland  
\* Corresponding author: [ali.tehrani@aalto.fi](mailto:ali.tehrani@aalto.fi)

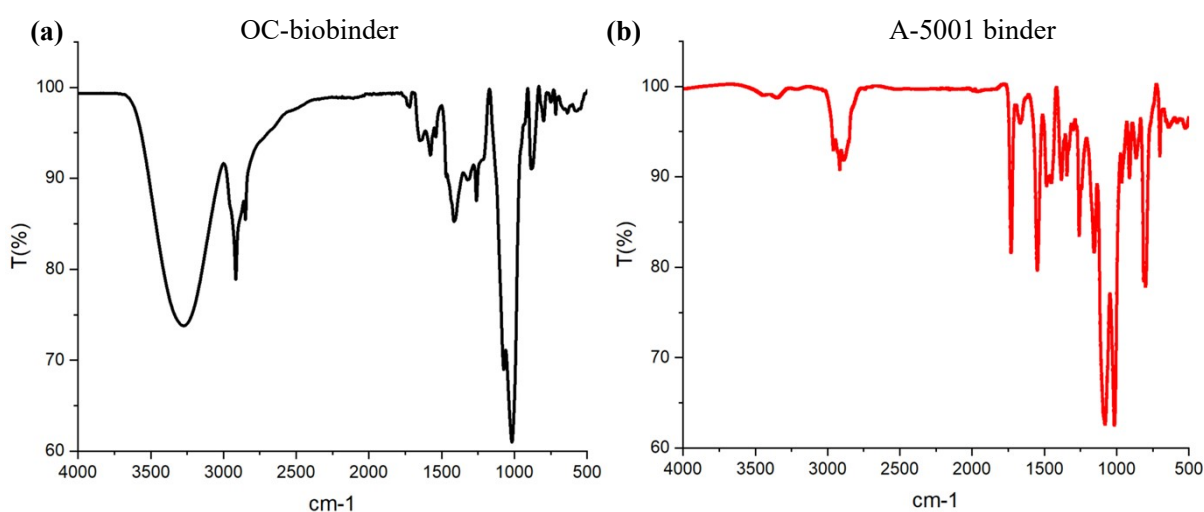

Figure S1. ATR-FTIR curve of the (a) OC-biobinder, and (b) ATR-FTIR curve of A-5001 binder.

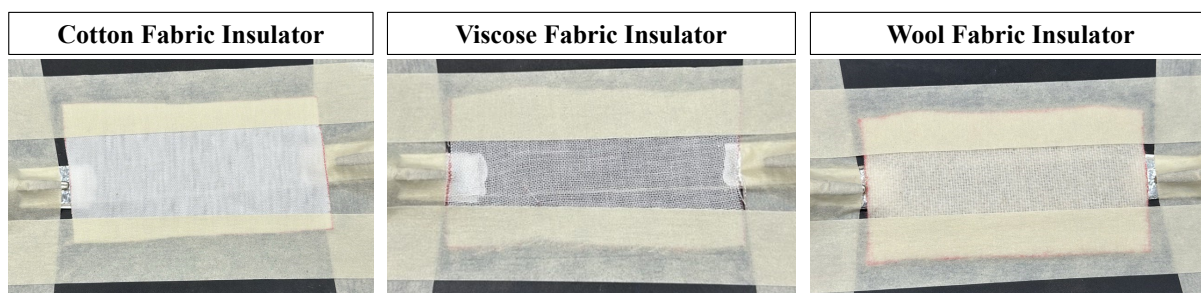

Figure S2. The attachment of the fabric insulators to the Joule heating pattern.
